# Supplementary material
Source: PubMed Central journal article supplement (PMC3290102)
Supplement: bi201852d_si_001.pdf [file bi201852d_si_001.pdf]

# **Conserved signal peptide recognition systems across the prokaryotic domains.**

Sarah J. Coulthurst, Alice Dawson, William N. Hunter and Frank Sargent.  
College of Life Sciences, University of Dundee, Dundee DD1 5EH, Scotland, United Kingdom.

## **SUPPLEMENTARY INFORMATION**

## SUPPLEMENTARY TABLE S1. Strains and plasmids used in this study.

| Name                                  | Description                                                                                                                                                                                                              | Reference / Source                      |
|---------------------------------------|--------------------------------------------------------------------------------------------------------------------------------------------------------------------------------------------------------------------------|-----------------------------------------|
| <b>Bacterial strains</b>              |                                                                                                                                                                                                                          |                                         |
| <i>E. coli</i> MC4100                 | Parental <i>E. coli</i> strain (F <sup>-</sup> , $\Delta$ lacU169, <i>araD139</i> , <i>rpsL150</i> , <i>relA1</i> , <i>ptsF</i> , <i>rbs</i> , <i>flbB5301</i> )                                                         | (1)                                     |
| <i>E. coli</i> DADE                   | MC4100 $\Delta$ tatABCD, $\Delta$ tatE                                                                                                                                                                                   | (2)                                     |
| <i>E. coli</i> K-38                   | HfrC, <i>phoA4</i> , <i>pit-10</i> , <i>tonA22</i> , <i>ompF627</i> , <i>relA1</i>                                                                                                                                       | (3)                                     |
| <i>E. coli</i> MCDSSAC                | MC4100 <i>amiA</i> <sup>-</sup> , <i>amiC</i>                                                                                                                                                                            | (4)                                     |
| <i>E. coli</i> MC4100-A               | Arabinose-resistant derivative of MC4100                                                                                                                                                                                 | (5)                                     |
| <i>E. coli</i> DADE-A                 | Arabinose-resistant derivative of DADE                                                                                                                                                                                   | (5)                                     |
| <i>E. coli</i> BTH101                 | Host strain for Bacterial Two Hybrid experiments, <i>cya</i> <sup>-</sup> (F <sup>-</sup> , <i>cya-99</i> , <i>araD139</i> , <i>galE15</i> , <i>galK16</i> , <i>rpsL1</i> , <i>hsdR2</i> , <i>mcrA1</i> , <i>mcrB1</i> ) | (6)                                     |
| <i>E. coli</i> BL21(DE3)              | Protein overproduction strain (F <sup>-</sup> , <i>ompT</i> , <i>hsdS</i> (rB <sup>-</sup> , mB <sup>-</sup> ), <i>dcm</i> , <i>gal</i> , $\lambda$ (DE3))                                                               | (7)                                     |
| <i>E. coli</i> BL21(DE3) $\Delta$ tat | $\Delta$ tatABC derivative of BL21(DE3)                                                                                                                                                                                  | B. Ize & T. Palmer; using method of (8) |
| <i>E. coli</i> BL21(DE3) pLysS        | As BL21(DE3), also producing T7 lysozyme                                                                                                                                                                                 | Promega Inc.                            |
| <b>Plasmids</b>                       |                                                                                                                                                                                                                          |                                         |
| pGH-SG1080110                         | Synthetic <i>ttrBACD</i> operon in pUC57 (Amp <sup>R</sup> )                                                                                                                                                             | This study                              |
| pUNIPROM                              | pT7.5-derived vector allowing constitutive expression under the control of the <i>E. coli</i> <i>tat</i> promoter or inducible expression from the upstream T7 promoter (Amp <sup>R</sup> )                              | (9)                                     |
| pUNI-TtrBACD                          | <i>ttrBACD</i> from synthetic operon in pUNIPROM                                                                                                                                                                         | This study                              |
| pUNI-TtrBAC                           | <i>ttrBAC</i> from synthetic operon in pUNIPROM                                                                                                                                                                          | This study                              |
| pUNI-TtrACD                           | <i>ttrACD</i> from synthetic operon in pUNIPROM                                                                                                                                                                          | This study                              |
| pUNI-TtrBC                            | <i>ttrBC</i> from synthetic operon in pUNIPROM                                                                                                                                                                           | This study                              |
| pUNI-TtrAD                            | <i>ttrAD</i> from synthetic operon in pUNIPROM                                                                                                                                                                           | This study                              |
| pUNI-ssTtrA <sub>Af</sub> -AmiA       | <i>ssTtrA<sub>Af</sub></i> (synthetic sequence) fused to <i>amiA</i> $\Delta$ 2-33 in pUNIPROM; to express ssTtrA <sub>Af</sub> -AmiA (mature AmiA from pTorASP-AmiA, Ize <i>et al.</i> , 2009)                          | This study                              |
| pSUPROM                               | pSU40-derived vector allowing constitutive expression under the control of the <i>E. coli</i> <i>tat</i> promoter (Kan <sup>R</sup> )                                                                                    | (9)                                     |
| pSU-ssTtrA <sub>Af</sub> -Bla         | <i>ssTtrA<sub>Af</sub></i> (synthetic sequence) fused to <i>bla</i> (lacking signal peptide) in pSUPROM; to express ssTtrA <sub>Af</sub> -Bla (derived from pSU-TorAss-Bla, G. Buchanan & T. Palmer,                     | This study                              |

|                                       |                                                                                                                                                                                                                                                        |            |
|---------------------------------------|--------------------------------------------------------------------------------------------------------------------------------------------------------------------------------------------------------------------------------------------------------|------------|
|                                       | unpublished)                                                                                                                                                                                                                                           |            |
| pBAD33                                | Arabinose-inducible expression vector (Cm <sup>R</sup> )                                                                                                                                                                                               | (10)       |
| pBAD24                                | Arabinose-inducible expression vector (Kan <sup>R</sup> )                                                                                                                                                                                              | (10)       |
| pBAD-TtrD                             | The <i>ttrD</i> gene (synthetic sequence) in pBAD33                                                                                                                                                                                                    | This study |
| pBAD-ssTtrA <sub>Af</sub> -GFP-SsrA   | <i>ssTtrA<sub>Af</sub></i> (synthetic sequence) fused to <i>gfp-ssrA</i> in pBAD24; to express ssTtrA <sub>Af</sub> -GFP-SsrA (based on pTGS, DeLisa <i>et al.</i> , 2007, and its derivative pBAD24-TorAss-GFP-SsrA, B. Ize & T. Palmer, unpublished) | This study |
| pETM-11                               | Protein overproduction vector for the generation of N-terminal His <sub>6</sub> -TEV cleavage site-protein fusions (Kan <sup>R</sup> )                                                                                                                 | (11)       |
| pETM-TtrD                             | Synthetic <i>ttrD</i> (AF0160) gene in pETM-11                                                                                                                                                                                                         | This study |
| pUT18                                 | Amp <sup>R</sup> (ori pMB1) vector for generation of N-terminal T18 fusions for the Bacterial Two Hybrid system (Amp <sup>R</sup> )                                                                                                                    | (6)        |
| pT25                                  | Cm <sup>R</sup> (p15A) vector for generation of C-terminal T25 fusions for the Bacterial Two Hybrid system (Cm <sup>R</sup> )                                                                                                                          | (12)       |
| pUT18-ssTtrA <sub>Af</sub>            | <i>ssTtrA<sub>Af</sub></i> (natural sequence, codons 1-36) in pUT18                                                                                                                                                                                    | This study |
| pUT18-ssTtrA <sub>Af</sub> _RA        | <i>ssTtrA<sub>Af</sub></i> (natural sequence, Region A: codons 1-26) in pUT18                                                                                                                                                                          | This study |
| pUT18-ssTtrA <sub>Af</sub> _RB        | <i>ssTtrA<sub>Af</sub></i> (natural sequence, Region B: codons 10-27) in pUT18                                                                                                                                                                         | This study |
| pUT18-ssTtrA <sub>Af</sub> _RC        | <i>ssTtrA<sub>Af</sub></i> (natural sequence, Region C: codons 11-36) in pUT18                                                                                                                                                                         | This study |
| pUT18-ssTtrA <sub>Af</sub> _RD        | <i>ssTtrA<sub>Af</sub></i> (natural sequence, Region D: codons 7-17) in pUT18                                                                                                                                                                          | This study |
| pUT18-ssTtrA <sub>Af</sub> _R6Q       | <i>ssTtrA<sub>Af</sub></i> (natural sequence) with R6Q substitution in pUT18                                                                                                                                                                           | This study |
| pUT18-ssTtrA <sub>Af</sub> _V15Q      | <i>ssTtrA<sub>Af</sub></i> (natural sequence) with V15Q substitution in pUT18                                                                                                                                                                          | This study |
| pUT18-ssTtrA <sub>Af</sub> _S17Q      | <i>ssTtrA<sub>Af</sub></i> (natural sequence) with S17Q substitution in pUT18                                                                                                                                                                          | This study |
| pUT18-ssTtrA <sub>Af</sub> _V20Q      | <i>ssTtrA<sub>Af</sub></i> (natural sequence) with V20Q substitution in pUT18                                                                                                                                                                          | This study |
| pUT18-ssTtrA <sub>Af</sub> _L22Q      | <i>ssTtrA<sub>Af</sub></i> (natural sequence) with L22Q substitution in pUT18                                                                                                                                                                          | This study |
| pUT18-ssTtrA <sub>Af</sub> _G24Q      | <i>ssTtrA<sub>Af</sub></i> (natural sequence) with G24Q substitution in pUT18                                                                                                                                                                          | This study |
| pT25-TtrD                             | The <i>ttrD</i> (AF0160) gene (natural sequence) in pT25                                                                                                                                                                                               | This study |
| pQE80-GST                             | Glutathione S transferase coding sequence in pQE80-L (to express His <sub>6</sub> -GST)                                                                                                                                                                | This study |
| pQE80-ssTtrA <sub>Af</sub> -GST       | <i>ssTtrA<sub>Af</sub></i> (synthetic sequence) in QE80_GST; for production of ssTtrA <sub>Af</sub> -GST                                                                                                                                               | This study |
| pQE80-ssTtrA <sub>Af</sub> -GST_TtrD1 | The <i>ttrD</i> (AF0160) gene (synthetic sequence) in pQE80-ssTtrA <sub>Af</sub> -GST; for co-production of TtrD and ssTtrA <sub>Af</sub> -GST                                                                                                         | This study |
| pQE80-GST-TtrD1                       | The <i>ttrD</i> (AF0160) gene (synthetic sequence) in pQE80-GST; for co-production of TtrD and His <sub>6</sub> -GST                                                                                                                                   | This study |

## SUPPLEMENTARY TABLE S2. Oligonucleotides used in this study.

| Name   | Sequence (5'-3')                                              | Details                                                                                                     |
|--------|---------------------------------------------------------------|-------------------------------------------------------------------------------------------------------------|
| SC1056 | <u>TATAGGATCC</u> ATGTCCCCATAGCTAGTTATTGGA                    | Forward primer to amplify GST from pGEX-5X-1 (BamHI)                                                        |
| SC1057 | <u>TATGAAGCTT</u> CAGATCCGATTTTGGAGG                          | Reverse primer to amplify GST from pGEX-5X-1 (HindIII)                                                      |
| SC1098 | <u>TATAGGATCC</u> ATGCAACTCTCCCGACGTG                         | Forward primer to clone ssTrA_Af (from synthetic operon) into pUNIPROM, pSUPROM and derived vectors (BamHI) |
| SC1077 | <u>TATATCTAG</u> ACCCGTGGCTTTACCAATCTATCC                     | Reverse primer to clone ssTrA_Af (from synthetic operon) into pUNIPROM, pSUPROM and derived vectors (XbaI)  |
| SC1113 | <u>TATAGAATT</u> CAGGAGAAATATCTATGCAACTCTCCCGACG              | Forward primer to clone ssTrA_Af (from synthetic operon) into pQE80-GST (EcoRI)                             |
| SC1114 | <u>TATAGGATCC</u> CCGTGGCTTTACCAATCTATCC                      | Reverse primer to clone ssTrA_Af (from synthetic operon) into pQE80-GST (BamHI)                             |
| SC1111 | <u>TATAGAATT</u> CAGGAGAAATACAAATGACAATCGGTCCGG               | Forward primer to clone Trd (from synthetic operon) into pQE80-GST and related vectors (EcoRI)              |
| SC1112 | <u>TATAGAATT</u> CTCAGTTGTATCGGCCCTTC                         | Reverse primer to clone Trd (from synthetic operon) into pQE80-GST and related vectors (EcoRI)              |
| SC1183 | <u>TATATCAT</u> GACAATCGGTCCGGCTAAAG                          | Forward primer to clone Trd_Af (from synthetic operon) into pETM-11 (RcaI)                                  |
| SC1112 | <u>TATAGAATT</u> CTCAGTTGTATCGGCCCTTC                         | Reverse primer to clone Trd (from synthetic operon) into pETM-11 (EcoRI)                                    |
| SC1045 | <u>TATAGGATCC</u> AGTGACCATAGGGAGGGCAAAG                      | Forward primer to clone Trd_Af into pT25 (BamHI)                                                            |
| SC1046 | <u>TATAGGTAC</u> CTCAATTTGTCAGCTCCCTC                         | Reverse primer to clone Trd_Af into pT25 (KpnI)                                                             |
| SC1049 | <u>TATAAAGCTT</u> GTAAAGAGGAGGATCCATGCAGCTTAGCAGGAGGG         | Forward primer to clone ssTrA_Af into pUT18 (HindIII)                                                       |
| SC1050 | <u>TATAGAATT</u> CGATCTCGGCTTAACCGACCTG                       | Reverse primer to clone ssTrA_Af into pUT18 (EcoRI)                                                         |
| SC1076 | IAIAGAAIICACCAIGCAACICICCCGACGTG                              | Forward primer to clone ssTrA (Af synthetic) into pBADssI or A-GFP-SsrA (EcoRI)                             |
| SC1077 | <u>TATATCTAG</u> ACCCGTGGCTTTACCAATCTATCC                     | Reverse primer to clone ssTrA (Af synthetic) into pBADssTorA-GFP-SsrA (XbaI)                                |
| SC1078 | <u>TATAGAGCT</u> CAGGAGGACAATGACAATCGG                        | Forward primer to clone Trd (Af synthetic) into pBAD33 (SacI)                                               |
| SC1079 | <u>TATAGGTAC</u> CTCAGTTGTATCGGCCCTTC                         | Reverse primer to clone Trd (Af synthetic) into pBAD33 (KpnI)                                               |
| SC1202 | <u>TATAGAATT</u> CGACGAGTAACCTGCGAGGAAACTG                    | Reverse primer to clone ssTrA_Af Region A into pUT18 (EcoRI)                                                |
| SC1183 | <u>TATAAAGCTT</u> GTAAAGAGGAGGATCCATGAAGGCTCTCGTGGCTTTGG      | Forward primer to clone ssTrA_Af Region B into pUT18 (HindIII)                                              |
| SC1184 | <u>TATAGAATT</u> CGATCCGAGTAACCTGCGAGG                        | Reverse primer to clone ssTrA_Af Region B into pUT18 (EcoRI)                                                |
| SC1185 | <u>TATAAAGCTT</u> GTAAAGAGGAGGATCCATGGTCTCTCGTGGCTTTGGC       | Forward primer to clone ssTrA_Af Region C into pUT18 (HindIII)                                              |
| SC1203 | <u>TATAAAGCTT</u> GTAAAGAGGAGGATCCATGGATTTTATAAGGCTCTCGTGGCTG | Forward primer to clone ssTrA_Af Region D into pUT18 (HindIII)                                              |
| SC1204 | <u>TATAGAATT</u> CGACGAGCAACAGCCACGAG                         | Reverse primer to clone ssTrA_Af Region D into pUT18 (EcoRI)                                                |
| SC1186 | CCATGCAGCTTAAAGAGGAGGATTTTAAAGGCTCTCG                         | Forward primer for Quikchange ssTrA_Af R6Q                                                                  |
| SC1187 | CGAGACCTTAATAAAATCTGCCTGCTAAGCTGCATGG                         | Reverse primer for Quikchange ssTrA_Af R6Q                                                                  |
| SC1188 | GGGTCTCGTGGCTCAGGCTCGGCATCAG                                  | Forward primer for Quikchange ssTrA_Af V15Q                                                                 |
| SC1189 | CTGATCCGAGCCCTGAGCCACGAGACCC                                  | Reverse primer for Quikchange ssTrA_Af V15Q                                                                 |
| SC1190 | TCTCGTGGCTGTGGCCAGGCATCAGTTTTCTCGC                            | Forward primer for Quikchange ssTrA_Af S17Q                                                                 |
| SC1191 | GCGAGGAAAATGATGCCTGCCCAACGCCACGAGA                            | Reverse primer for Quikchange ssTrA_Af S17Q                                                                 |
| SC1192 | CTGTTGGCTCGGCATCACAGTTCTCGCAGGTTACTCG                         | Forward primer for Quikchange ssTrA_Af V20Q                                                                 |
| SC1193 | CGAGTAACCTGCGAGGAACCTGATGCCGAGCCAAACAG                        | Reverse primer for Quikchange ssTrA_Af V20Q                                                                 |
| SC1194 | GCTCGGCATCAGTTTTCCAGGAGGTTACTCGG                              | Forward primer for Quikchange ssTrA_Af L22Q                                                                 |
| SC1195 | CCGAGTAACCTGCCTGAAAATGATGCCGAGC                               | Reverse primer for Quikchange ssTrA_Af L22Q                                                                 |
| SC1196 | CGGCATCAGTTTTCTCGCACAGTACTCGGAAACAGTTGAC                      | Forward primer for Quikchange ssTrA_Af G24Q                                                                 |
| SC1197 | GTCACCTGTTTCCGAGTACTGTGCGAGGAAAATGATGCCG                      | Reverse primer for Quikchange ssTrA_Af G24Q                                                                 |

Restriction sites used for cloning are underlined.  
 \* Trd was amplified as an RcaI-EcoRI fragment and then cloned into pETM-11 cut NcoI-EcoRI  
 All primers were obtained from Sigma-Genosys, UK.

### SUPPLEMENTARY TABLE S3. Structure statistics for TtrD.

| PDB Code                                  | 2xol                     |       |       | 2yjm              |       |       | 2y6y                   |       |       |
|-------------------------------------------|--------------------------|-------|-------|-------------------|-------|-------|------------------------|-------|-------|
| <b>Crystal Statistics</b>                 |                          |       |       |                   |       |       |                        |       |       |
| Resolution range (Å)                      | 1.35-64.69               |       |       | 1.84 – 35.01      |       |       | 2.20 – 55.93           |       |       |
| Space Group                               | $P2_1$                   |       |       | $C2$              |       |       | $P3_221$               |       |       |
| <b>Unit cell dimensions:</b>              |                          |       |       |                   |       |       |                        |       |       |
| $a, b, c$ (Å)                             | 62.76                    | 52.54 | 64.95 | 91.16             | 37.93 | 49.12 | 87.06                  | 87.06 | 83.39 |
| $\beta$ (°)                               | 91.26                    |       |       | 94.16             |       |       | -                      |       |       |
| <b>Scaling Statistics</b>                 |                          |       |       |                   |       |       |                        |       |       |
| Data collection location                  | ESRF ID-29               |       |       | In – house        |       |       | ESRF ID-29             |       |       |
| No. Measurements                          | 622523 (80665)           |       |       | 27711 (943)       |       |       | 188108 (12266)         |       |       |
| Unique reflections                        | 89700 (12764)            |       |       | 13256 (1796)      |       |       | 18960 (2751)           |       |       |
| Redundancy                                | 6.9 6.3                  |       |       | 2.1 2.1           |       |       | 9.9 4.5                |       |       |
| Completeness (%)                          | 96.9 94.9                |       |       | 90.6 84.7         |       |       | 100 100                |       |       |
| $\langle I / \sigma(I) \rangle$           | 17.6 4.2                 |       |       | 9.9 4.3           |       |       | 14.1 3.5               |       |       |
| $R_{\text{merge}}$ (%)                    | 5.4 49.2                 |       |       | 5.6 15.9          |       |       | 11.2 38.9              |       |       |
| <b>Refinement Statistics</b>              |                          |       |       |                   |       |       |                        |       |       |
| $R_{\text{work}}$ (%) / No of reflections | 14.85 / 85158            |       |       | 21.41 / 12576     |       |       | 21.7 / 17981           |       |       |
| $R_{\text{free}}$ (%) / No of reflections | 17.54 / 4523             |       |       | 24.51 / 680       |       |       | 23.8 / 955             |       |       |
| R.M.S.D bond lengths (Å)                  | 0.011                    |       |       | 0.009             |       |       | 0.011                  |       |       |
| R.M.S.D bond angles (°)                   | 1.27                     |       |       | 0.986             |       |       | 1.13                   |       |       |
| DPI <sup>1</sup>                          | 0.046                    |       |       | 0.155             |       |       | 0.165                  |       |       |
| <b>Ramachandran:</b>                      |                          |       |       |                   |       |       |                        |       |       |
| Favoured region (%)                       | 98.5                     |       |       | 98.8              |       |       | 98.11                  |       |       |
| Outliers (%)                              | 0.0                      |       |       | 0.0               |       |       | 0.63                   |       |       |
| <b>Model Statistics</b>                   |                          |       |       |                   |       |       |                        |       |       |
| <b>Protein residues:</b>                  |                          |       |       |                   |       |       |                        |       |       |
| No. in subunits                           | 168 / 172                |       |       | 165 / -           |       |       | 163 / -                |       |       |
| Overall $B$ -factor                       | 20.42   20.88            |       |       | 41.72 / -         |       |       | 40.02 / -              |       |       |
| Side chain                                | 22.41   22.02            |       |       | 43.30 / -         |       |       | 42.33 / -              |       |       |
| Main chain                                | 18.20   18.40            |       |       | 40.05 / -         |       |       | 38.37 / -              |       |       |
| <b>Additional groups:</b>                 |                          |       |       |                   |       |       |                        |       |       |
| Solvent                                   | 393 / 40.7               |       |       | 88 / 33.13        |       |       | 70 / 40.69             |       |       |
| Other entities                            | Ethane diol (EDO) / 30.3 |       |       | CHES (NHE) / 42.7 |       |       | Cl <sup>-</sup> / 31.0 |       |       |

<sup>1</sup> DPI, The diffraction-component precision index ( $I3$ ).

## SUPPLEMENTARY REFERENCES

---

1. Casadaban, M. J., and Cohen, S. N. (1979) Lactose genes fused to exogenous promoters in one step using a Mu-lac bacteriophage: in vivo probe for transcriptional control sequences, *Proc Natl Acad Sci U S A* 76, 4530-4533.
  2. Wexler, M., Sargent, F., Jack, R. L., Stanley, N. R., Bogsch, E. G., Robinson, C., Berks, B. C., and Palmer, T. (2000) TatD is a cytoplasmic protein with DNase activity. No requirement for TatD family proteins in sec-independent protein export, *J Biol Chem* 275, 16717-16722.
  3. Lyons, L. B., and Zinder, N. D. (1972) Genetic map of filamentous bacteriophage F1, *Virology* 49, 45-&.
  4. Ize, B., Stanley, N. R., Buchanan, G., and Palmer, T. (2003) Role of the *Escherichia coli* Tat pathway in outer membrane integrity, *Molecular microbiology* 48, 1183-1193.
  5. Ize, B., Gerard, F., Zhang, M., Chanal, A., Voulhoux, R., Palmer, T., Filloux, A., and Wu, L. F. (2002) In vivo dissection of the Tat translocation pathway in *Escherichia coli*, *J Mol Biol* 317, 327-335.
  6. Karimova, G., Ullmann, A., and Ladant, D. (2001) Protein-protein interaction between *Bacillus stearothermophilus* tyrosyl-tRNA synthetase subdomains revealed by a bacterial two-hybrid system, *J Mol Microbiol Biotechnol* 3, 73-82.
  7. Studier, F. W., and Moffatt, B. A. (1986) Use of bacteriophage T7 RNA polymerase to direct selective high-level expression of cloned genes, *J Mol Biol* 189, 113-130.
  8. Orriss, G. L., Tarry, M. J., Ize, B., Sargent, F., Lea, S. M., Palmer, T., and Berks, B. C. (2007) TatBC, TatB, and TatC form structurally autonomous units within the twin arginine protein transport system of *Escherichia coli*, *FEBS Lett* 581, 4091-4097.
  9. Jack, R. L., Buchanan, G., Dubini, A., Hatzixanthis, K., Palmer, T., and Sargent, F. (2004) Coordinating assembly and export of complex bacterial proteins, *EMBO J* 23, 3962-3972.
  10. Guzman, L. M., Belin, D., Carson, M. J., and Beckwith, J. (1995) Tight regulation, modulation, and high-level expression by vectors containing the arabinose P<sub>BAD</sub> promoter, *J Bacteriol* 177, 4121-4130.
  11. Dümmler, A., Lawrence, A. M., and de Marco, A. (2005) Simplified screening for the detection of soluble fusion constructs expressed in *E. coli* using a modular set of vectors, *Microb Cell Fact* 4, 34.
  12. Karimova, G., Pidoux, J., Ullmann, A., and Ladant, D. (1998) A bacterial two-hybrid system based on a reconstituted signal transduction pathway, *Proc Natl Acad Sci U S A* 95, 5752-5756.
  13. Cruickshank, D. W. (1999) Remarks about protein structure precision, *Acta Cryst D, Biol Cryst* 55, 583-601.
-
